# Mathematical Modeling and Optimal Control Analysis of COVID-19 in Ethiopia

Haileyesus Tessema Alemneh<sup>1</sup> and Getachew Teshome Tilahun<sup>2</sup>

<sup>1</sup>*Department of Mathematics, University of Gondar, Gondar, Ethiopia*

Email: [haila.tessema@gmail.com](mailto:haila.tessema@gmail.com)

<sup>2</sup>*Department of Mathematics, Haramaya University, Dire Dawa, Ethiopia*

Email: [gmgech@gmail.com](mailto:gmgech@gmail.com)

## Abstract

In this paper we developed a deterministic mathematical model of the pandemic COVID-19 transmission in Ethiopia, which allows transmission by exposed humans. We proposed an SEIR model using system of ordinary differential equations. First the major qualitative analysis, like the disease free equilibrium point, endemic equilibrium point, basic reproduction number, stability analysis of equilibrium points and sensitivity analysis was rigorously analysed. Second, we introduced time dependent controls to the basic model and extended to an optimal control model of the disease. We then analysed using Pontryagin's Maximum Principle to derive necessary conditions for the optimal control of the pandemic. The numerical simulation indicated that, an integrated strategy effective in controlling the epidemic and the government must apply all control strategies in combating COVID-19 at short period of time.

**Keywords:** COVID-19; Optimal control; Modeling; Ethiopia; Numerical Simulation.

## 1 Introduction

Corona virus disease (COVID-19) which is caused by novel corona virus is a respiratory illness that can spread from person to person [1, 2, 3]. People with COVID-19 have had a wide range of symptoms reported – ranging from mild symptoms to severe illness. Symptoms may appear 2-14 days after exposure to the virus. People with these symptoms may have COVID-19: fever or chills, cough, shortness of breath or difficulty breathing, fatigue, muscle or body aches, headache, new loss of taste or smell, sore throat, congestion or runny nose, nausea or vomiting, diarrhea [1, 4].

The outbreak was first identified in Wuhan, China, in December, 2019, which has been spreading worldwide [5, 6] . Following the day of the outbreak of the pandemic to present more than seven million globally confirmed cases and half million deaths as well as four million recovered numbers [7]. In Africa also the virus spread to 57 countries [1, 7]. Through out Africa up to Jun 14, 2020 confirmed cases are 235,707, number of deaths are 6,283 and recoveries are 36,850 [8].

In order to combat this pandemic, different preventive measures are recommended, such as avoiding close contact with sick people, avoiding touching the eyes, nose and mouth with unwashed hands, washing hands often with soap and water for at least 20 seconds, using an alcohol-based hand sanitizer containing at least 60% alcohol when soap and water are not available [1, 3, 4]. Limit the number of people you have close contact with, or are visited by, to a few at a time. For infected individuals, staying home, covering cough or sneeze with a tissue, then throw the tissue in the trash, and clean and disinfect frequently touched objects are recommended for controlling COVID-19, perform home quarantine for 14 days after the last contact with a patient with confirmed COVID-19 [9, 10].

Mathematical models with optimal control analysis has become an important tool in order to understand the dynamics of disease transmission and decision making processes regarding intervention programs for the disease control. COVID-19 have been modeled by very few researchs after the outbreak of the disease. The study by [11], used an SIR model to predict the magnitude of the COVID-19 epidemic in Pakistan and compared the numbers with the reported cases on the national database. They predicted that 90% of the population will have become infected with the virus if policy interventions seeking to curb this infection are not adopted aggressively. The study presented in [12] used SEIR compartments by considering limited parameters, from January 22, 2020 to March 3, 2020 and Prediction SEIR forecasted by using SEIR model They also looked at the feelings, current disease trends and economic and political impacts. The article [13], proposed conceptual models for the COVID-19 outbreak in Wuhan with the consideration of individual behavioural reaction and governmental actions, e.g., holiday extension, travel restriction, hospitalisation and quarantine. The article published by [12] also proposed SEIR model by incorporating the intrinsic impact of hidden exposed and infectious cases on the entire procedure of epidemic, which is difficult for traditional statistics analysis. The other study is done in China using SIR by considering logistic growth [11]. Using their model, the study approximated future number of cases in china and proposed possible controlling mechanisms. The study [14] simulated the ongoing trajectory of Covid 19 outbreak in Wuhan using an age-structured SEIR model for several

physical distancing measures. The article presented by [15], proposed a compartmental model by dividing the quarantined individuals in to two sub-groups. They developed an SEIRU model where R and U are quarantine-infected individuals expected to recover and meet undetectable criteria. A more detail model is proposed by [16], and studied a mathematical modeling of the spread of the COVID-19 taking into account the undetected infections, in China. The study in [17], proposed a new epidemic model in the case of Italy that discriminates between infected individuals depending on whether they have been diagnosed and on the severity of their symptoms. However, all of the above models studied the dynamics of disease transmission, they did not study finding an optimal control strategy using the maximum principle of Pontryagin.

From all the above studies we can understand that, COVID-19 have been modeled by considering different situations. In the case of Ethiopia, the proposed model can't reflect the real situation of the country. Currently Ethiopia is implementing different measure to control COVID-19 including implementing state of emergency, country border closing and mandatory quarantine of new arrivals for 14 days. herefore, in the present paper we extend the SEIR model with the aforementioned control measures and propose an optimal control strategy.

The paper is organized as follows. In Section 2 was devoted to the model description and the underlying assumptions. In Section 3 we carry out mathematical analysis of this COVID-19 model. In Section 4 we propose an optimal control problem and and the optimal control analysis are presented. In Section 5 numerical simulation and calibration of the model was implemented for the various strategies considered in this work. The conclusion was presented in Section 6.

## 2 Model Description and Formulation

In this model the entire population is divided into four sub-populations: Susceptible individuals (denoted by  $S$ ) are those who are not infected by the disease pathogen but there is a possibility to be infected. Exposed individuals (denoted by  $E$ ) are individuals who are in the incubation period after being infected and have no visible clinical signs and these individuals could infect other people with a higher probability than people in the infected compartments. After the incubation period, the person passes to the infected compartment; infected individuals (denoted by  $I$ ) are individuals who developed the symptom of the disease. Recovered individuals (denoted by  $R$ ) are those individuals who recovered from the disease.

Individuals are recruitment at a rate  $\pi$  is either through immigration or birth. The susceptible individuals got infection of COVID-19 disease at a contact rate of  $\beta$  either from infected with

probability of  $\sigma_1$  or from exposed individuals with probability of  $\sigma_2$  and move to the exposed compartment. The exposed individuals become infectious and join the infected compartment at  $\tau\delta$  and the remaining proportion of this exposed individuals develop natural immunity and recovered from the disease. By the treatment given, the infected individuals will recover and move to the recovered compartment at a rate of  $\epsilon$ , or may die due to the disease at a rate of  $\rho$ . The recovered individuals become again susceptible to the disease at a rate of  $\eta$ . The whole population have an average death rate of  $\mu$ . Table 1 shows the description of model parameters. The flow diagram of the model is shown in Figure 1 below.

With regards to the above assumptions, the model is governed by the following system of differential equation:

$$\begin{aligned}
 \frac{dS}{dt} &= \pi + \eta R - \beta(\sigma_1 I + \sigma_2 E)S - \mu S \\
 \frac{dE}{dt} &= \beta(\sigma_1 I + \sigma_2 E)S - (\delta + \mu) E \\
 \frac{dI}{dt} &= \tau \delta E - (\epsilon + \rho + \mu) I \\
 \frac{dR}{dt} &= (1 - \tau)\delta E + \epsilon I - (\mu + \eta) R
 \end{aligned}
 \tag{1}$$

With the initial condition

$$S(0) = S_0 \geq 0, E(0) = E_0 \geq 0, I(0) = I_0 \geq 0, R(0) = R_0 \geq 0
 \tag{2}$$

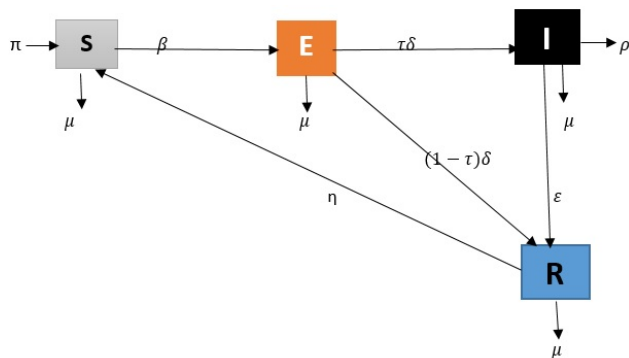

Figure 1: Compartmental flow diagram of the pandemic COVID 19 transmission

Table 1: Description of parameters of the model (1).

| Parameter     | Description                                                     |
|---------------|-----------------------------------------------------------------|
| $\pi$         | Recruitment rate of individuals                                 |
| $\beta$       | Contact rate of susceptible individuals                         |
| $\rho$        | Death rate due to disease                                       |
| $\delta$      | Proportion of exposed individuals leaving the compartment.      |
| $\varepsilon$ | Recovery rate of individuals from the disease                   |
| $\tau$        | Proportion of exposed individuals who join infected compartment |
| $\mu$         | Natural death rate                                              |
| $\eta$        | Proportion of recovered individuals to be susceptible.          |

### 3 Model Analysis

#### 3.1 Invariant Region

Let us determine a region in which the solution of model (1) is bounded. For this model the total population is  $N(S, E, I, R) = S(t) + E(t) + I(t) + R(t)$ . Then, differentiating  $N$  with respect to time we obtain:

$$\frac{dN}{dt} = \frac{dS}{dt} + \frac{dE}{dt} + \frac{dI}{dt} + \frac{dR}{dt} = \pi - \rho I - \mu N$$

If there is no death due to the disease, we get

$$\frac{dN}{dt} \leq \pi - \mu N \quad (3)$$

After solving equation (3) and evaluating it as  $t \rightarrow \infty$ , we got

$$\Omega = \{(S, E, I, R) \in \mathbb{R}_+^4 : N(t) \leq \frac{\pi}{\mu}\}$$

Which is the feasible solution set for the model (1) and all the solution set is bounded in it.

#### 3.2 Positivity of Solutions

**Theorem 3.1.** *If  $S(0) > 0, E(0) > 0, I(0) > 0, R(0) > 0$  are positive in the feasible set  $\Omega$ , then the solution set  $(S(t), E(t), I(t), R(t))$  of system (1) is positive for all  $t \geq 0$ .*

*Proof.* : From the first equation of the system

$$\frac{dS}{dt} = \pi + \eta R - \beta(\sigma_1 I + \sigma_2 E)S - \mu S$$

which can be taken as

$$\frac{dS}{dt} \geq -\mu S \quad (4)$$

After evaluating equation (4), we obtain

$$S \geq S(0)e^{-\mu t}$$

Similarly, we obtain

$$\begin{aligned} E &\geq E(0)e^{-(\delta+\mu)t} \\ I &\geq I(0)e^{-(\varepsilon+\rho+\mu)t} \\ R &\geq R(0)e^{-(\eta+\mu)t} \end{aligned}$$

Therefore, all the solution sets are positive for  $t \geq 0$ . □

### 3.3 Disease Free Equilibrium Point(DFEP)

When there is no infectious person of the disease in the population, I.e  $E = I = 0$ , the disease free equilibrium occur and is obtained by taking the right side of Eq. (1) equal to zero. Therefore the disease free equilibrium point is given by:

$$E_0 = \left(\frac{\pi}{\mu}, 0, 0, 0\right) \quad (5)$$

### 3.4 Basic reproduction number

We calculate the basic reproduction number  $\mathfrak{R}_0$  of the system by applying the next generation matrix method as laid out by [18]. The first step is rewrite the model equations, starting with newly infective classes:

$$\begin{aligned} \frac{dE}{dt} &= \beta(\sigma_1 I + \sigma_2 E)S - (\delta + \mu) E \\ \frac{dI}{dt} &= \tau \delta E - (\varepsilon + \rho + \mu) I \\ \frac{dR}{dt} &= (1 - \tau)\delta E + \varepsilon I - (\mu + \eta) R \end{aligned} \quad (6)$$

Then by the principle of next-generation matrix, the Jacobian matrices at DFE is given by

$$\mathcal{F} = \begin{pmatrix} \frac{\beta\sigma_2\Pi}{\mu} & \frac{\beta\sigma_1\Pi}{\mu} & 0 \\ 0 & 0 & 0 \\ 0 & 0 & 0 \end{pmatrix} \text{ and } \mathcal{V} = \begin{pmatrix} \delta + \mu & 0 & 0 \\ -\tau\delta & \varepsilon + \rho + \mu & 0 \\ -(1 - \tau)\delta & -\varepsilon & \mu + \eta \end{pmatrix}$$

$$\mathcal{FV}^{-1} = \begin{pmatrix} \frac{(\sigma_1 \delta \tau + \sigma_2 (\epsilon + \mu + \rho)) \beta \Pi}{\mu (\epsilon + \rho + \mu) (\delta + \mu)} & \frac{\beta \sigma_1 \Pi}{\mu (\epsilon + \rho + \mu)} & 0 \\ 0 & 0 & 0 \\ 0 & 0 & 0 \end{pmatrix}$$

Therefore, the basic reproduction number is given us

$$\mathfrak{R}_0 = \frac{\beta \Pi (\sigma_1 \tau \delta + \sigma_2 (\epsilon + \rho + \mu))}{\mu (\epsilon + \rho + \mu) (\delta + \mu)} \quad (7)$$

$\mathfrak{R}_0$  is a threshold parameter that represents the average number of infection caused by one infectious individual when introduced in the susceptible population [18].

### 3.5 Local Stability of DFEP

**Theorem 3.2.** *The DFEP point is locally asymptotically stable if  $\mathfrak{R}_0 < 1$  and unstable if  $\mathfrak{R}_0 > 1$ .*

*Proof.* The Jacobian matrix, evaluated at the disease-free equilibrium  $E_0$ , we get:

$$J = \begin{pmatrix} -\mu & -\frac{\beta \sigma_2 \Pi}{\mu} & -\frac{\beta \sigma_1 \Pi}{\mu} & \eta \\ 0 & \frac{\beta \sigma_2 \Pi}{\mu} - \delta - \mu & \frac{\beta \sigma_1 \Pi}{\mu} & 0 \\ 0 & \tau \delta & -\epsilon - \mu - \rho & 0 \\ 0 & (1 - \tau) \delta & \epsilon & -\mu - \eta \end{pmatrix}$$

The characteristic polynomial from the Jacobian matrix is

$$(-\lambda - (\eta + \mu))(-\lambda - \mu)(\lambda^2 + \psi_1 \lambda + \psi_2) = 0 \quad (8)$$

Where

$$\psi_1 = \frac{-\beta \sigma_2 \Pi + \delta \mu + \mu \epsilon + 2 \mu^2 + \mu \rho}{\mu}$$

$$\psi_2 = \frac{-\Pi \beta \delta \tau \sigma_1 - \Pi \beta \epsilon \sigma_2 - \Pi \beta \mu \sigma_2 - \Pi \beta \rho \sigma_2 + \delta \epsilon \mu + \delta \mu^2 + \delta \mu \rho + \epsilon \mu^2 + \mu^3 + \mu^2 \rho}{\mu}$$

From the Eq.(8), we see that

$$-\lambda - (\eta + \mu) \Rightarrow \lambda_1 = -(\eta + \mu) < 0 \quad \text{and} \quad -\lambda - \mu \Rightarrow \lambda_2 = -\mu < 0$$

From the last expression, that is

$$\lambda^2 + \psi_1 \lambda + \psi_2 = 0 \quad (9)$$

We applied Routh-Hurwitz criteria and by the principle Eq.(8) has strictly negative real root iff  $\psi_1 > 0$ ,  $\psi_2 > 0$  and  $\psi_1 \psi_2 > 0$ . Clearly we see that  $\psi_1 > 0$  because it is the sum of positive

parameters.

$$\psi_1 = \frac{(\varepsilon + \rho + \mu)}{(\delta + \mu)} + \frac{\beta \Pi \sigma_1 \tau \delta}{\mu (\varepsilon + \rho + \mu) (\delta + \mu)} + 1 - \mathfrak{R}_0 > 0$$

$$\psi_2 = (\varepsilon + \rho + \mu) (\delta + \mu) [1 - \mathfrak{R}_0] > 0$$

Hence the DFEP is locally asymptotically stable if  $\mathfrak{R}_0 < 1$ . □

### 3.6 Global Stability of DFEP

**Theorem 3.3.** *The DFEP  $E_0$  of the model (1) is globally asymptotically stable if  $\mathfrak{R}_0 < 1$ .*

*Proof.* Consider the following Lyapunov function

$$V = c_1 E + c_2 I \tag{10}$$

Differentiating equation (10) with respect to  $t$  gives

$$\frac{dV}{dt} = c_1 \frac{dE}{dt} + c_2 \frac{dI}{dt} \tag{11}$$

Substituting  $\frac{dE}{dt}$  and  $\frac{dI}{dt}$  from the model (1), we get:

$$\begin{aligned} \frac{dV}{dt} &= c_1 [\beta (\sigma_1 I + \sigma_2 E) S - (\delta + \mu) E] + c_2 [\tau \delta E - (\varepsilon + \rho + \mu) I] \\ &= c_1 \beta \sigma_1 S I - c_2 (\varepsilon + \rho + \mu) I + c_1 (\beta \sigma_2 S E - (\delta + \mu) E) + c_2 \tau \delta E \end{aligned}$$

Here take  $c_2 = -\frac{\beta \sigma_2 S - (\delta + \mu)}{\tau \delta} c_1$ , then we have

$$\frac{dV}{dt} = \left[ \frac{\beta \sigma_1 S \tau \delta + \beta \sigma_2 S (\varepsilon + \rho + \mu) - (\delta + \mu) (\varepsilon + \rho + \mu)}{\tau \delta} \right] c_1 I$$

Taking  $c_2 = 1$ , and substituting  $\mathfrak{R}_0$  we get

$$\frac{dV}{dt} \leq \frac{(\delta + \mu) (\varepsilon + \rho + \mu)}{\tau \delta} (\mathfrak{R}_0 - 1) I$$

for  $S \leq S^0 = \frac{\pi}{\mu}$  and  $\frac{dV}{dt} \leq 0$  for  $\mathfrak{R}_0 < 1$  and  $\frac{dV}{dt} = 0$  if and only if  $I = 0$ . This implies that the only trajectory of the system (1) on which  $\frac{dV}{dt} \leq 0$  is  $E^0$ . Therefore by Lasalle's invariance principle,  $E^0$  is globally asymptotically stable in  $\Omega$ . □

### 3.7 Existence of endemic equilibrium (EEP)

In the presence of disease in the population, ( $S(t) \geq 0$ ;  $E(t) \geq 0$ ;  $I(t) \geq 0$ ,  $R(t) \geq 0$ ), there exist an equilibrium point called endemic equilibrium point denoted by  $E^* = (S^*, E^*, I^*, R^*) \neq 0$ .

**Lemma 3.4.** *The Zika-only model has a unique endemic equilibrium if and only if  $\mathfrak{R}_0 > 1$ .*



*Proof.* It can be obtained by equating each equation of the model equal to zero. i.e

$$\frac{dS}{dt} = \frac{dE}{dt} = \frac{dI}{dt} = \frac{dR}{dt} = 0$$

Then we obtain

$$\begin{cases} S^* &= \frac{(\delta+\mu)(\varepsilon+\rho+\mu)}{\beta(\tau\delta+\varepsilon+\rho+\mu)} \\ E^* &= \frac{\mu(\delta+\mu)(\varepsilon+\rho+\mu)^2(\eta+\mu)[1-\mathfrak{R}_0]}{\beta\kappa} \\ I^* &= \frac{\tau\delta\mu(\delta+\mu)(\varepsilon+\rho+\mu)(\eta+\mu)[1-\mathfrak{R}_0]}{\beta\kappa} \\ R^* &= \frac{\delta[\tau(\varepsilon+\rho+\mu)+\eta+\mu][1-\mathfrak{R}_0]}{\beta\kappa} \end{cases} \quad (12)$$

Where

$$\begin{aligned} \kappa &= \delta^2\eta\tau^2\varepsilon - (\varepsilon + \rho + \mu)[\delta^2\tau(\eta\tau + \mu) + \delta\tau(\eta\tau + \mu^2)] \\ &\quad - (\varepsilon + \rho + \mu)^2\mu(\delta + \eta + \mu) - \delta\eta\mu\tau(2\mu + 3\rho) - \delta\eta\tau\rho^2 \end{aligned}$$

□

**Theorem 3.5.** *The EEP is locally asymptotically stable if  $\mathfrak{R}_0 > 1$  and unstable if otherwise.*

*Proof.* The Jacobian matrix of system (1) at the DFEP is given by

$$J = \begin{pmatrix} -\mu & -\frac{\beta\sigma_2\Pi}{\mu} & -\frac{\beta\sigma_1\Pi}{\mu} & \eta \\ 0 & \frac{\beta\sigma_2\Pi}{\mu} - \delta - \mu & \frac{\beta\sigma_1\Pi}{\mu} & 0 \\ 0 & \tau\delta & -\varepsilon - \mu - \rho & 0 \\ 0 & (1-\tau)\delta & \varepsilon & -\mu - \eta \end{pmatrix} \quad (13)$$

To determine the local stability of endemic equilibrium, we used the center manifold theory [19], by taking  $\beta$  as a bifurcation parameter. let  $S = z_1$ ,  $E = z_2$ ,  $I = z_3$  and  $R = z_4$ . In addition, using vector notation  $z = (z_1, z_2, z_3, z_4)^T$ , formulated as  $\frac{dz}{dt} = F(z)$ , with  $F = (f_1, f_2, f_3, f_4, f_5)^T$  and the disease free equilibrium is given by  $(z_1 = \frac{\Pi}{\mu}, z_2 = 0, z_3 = 0, z_4 = 0)$ . Then the value of  $\beta$  as a bifurcation parameter and solve  $\mathfrak{R}_0 = 1$ , which leads to

$$\beta = \beta^* = \frac{\mu(\varepsilon + \rho + \mu)(\delta + \mu)}{\Pi(\sigma_1\tau\delta + \sigma_2(\varepsilon + \rho + \mu))}$$

The right eigenvector,  $w = (w_1, w_2, w_3, w_4)^T$ , associated with this simple zero eigenvalue can be

obtained as:

$$w_1 = \frac{-(\delta + \mu)(\eta + \mu)(\varepsilon + \rho + \mu) + \delta(\varepsilon + \rho + \mu) - \delta\tau(\rho + \mu)}{\mu(\eta + \mu)(\varepsilon + \rho + \mu)} w_2,$$

$$w_2 = w_2 > 0,$$

$$w_3 = \frac{\delta\tau}{\varepsilon + \rho + \mu} w_2,$$

$$w_4 = \frac{\delta(\varepsilon + \rho + \mu) - \delta\tau(\rho + \mu)}{(\eta + \mu)(\varepsilon + \rho + \mu)} w_2$$

The left eigenvector,  $v = (v_1, v_2, v_3, v_4, v_5)$ , associated with this simple zero eigenvalue is given by

$$v_1 = v_4 = 0, v_2 = v_2 > 0, v_3 = \frac{\sigma_1 \Pi (\delta + \mu)}{\Pi (\sigma_1 \tau \delta + \sigma_2 (\varepsilon + \rho + \mu))} v_2$$

Since the first and fourth component of  $v$  are zero, we don't need the derivatives of  $f_1$  and  $f_4$ . From the derivatives of  $f_2$  and  $f_3$ , the only ones that are nonzero are the following:

$$\frac{\partial^2 f_2}{\partial z_2 \partial z_1} = \frac{\partial^2 f_2}{\partial z_1 \partial z_2} = \beta^* \sigma_2, \quad \frac{\partial^2 f_3}{\partial z_3 \partial z_1} = \frac{\partial^2 f_3}{\partial z_1 \partial z_3} = \beta^* \sigma_1, \quad \frac{\partial^2 f_2}{\partial z_2 \partial \beta} = \sigma_2 z_1, \quad \frac{\partial^2 f_2}{\partial z_3 \partial \beta} = \sigma_1 z_1$$

and all the other partial derivatives of are zero. The direction of the bifurcation at  $\mathfrak{R}_{0d} = 1$  is determined by the signs of the bifurcation coefficients  $a$  and  $b$ , obtained from the above partial derivatives, given respectively by

$$\begin{aligned} a &= 2v_2 w_1 w_2 \frac{\partial^2 f_2}{\partial z_1 \partial z_2} + 2v_2 w_1 w_3 \frac{\partial^2 f_2}{\partial z_1 \partial z_3} \\ &= 2v_2 w_1 \beta^* [\sigma_2 w_2 + \sigma_1 w_3] \\ &= -\frac{2(\delta + \mu)}{\Pi(\eta + \mu)(\varepsilon + \rho + \mu)} [(\delta + \mu)(\eta + \mu)(\varepsilon + \rho + \mu) - \delta(\varepsilon + \rho + \mu) + \delta\tau(\rho + \mu)] w_2 < 0 \end{aligned}$$

and

$$b = v_2 w_2 \frac{\partial^2 f_2}{\partial z_1 \partial \beta^*} + v_2 w_3 \frac{\partial^2 f_2}{\partial z_3 \partial \beta^*} = \frac{\Pi}{\mu} \left[ \sigma_2 + \frac{\delta\tau}{\varepsilon + \rho + \mu} \sigma_1 \right] > 0 \quad (14)$$

Do to the sign of the coefficient  $a < 0$  and  $b > 0$  at  $\beta^*$ , by the theorem 4.1 stated in [19] system (11) undergo forward bifurcation at  $\mathfrak{R}_0 = 1$  and the unique endemic equilibrium is locally asymptotically stable for  $\mathfrak{R}_0 > 1$ .  $\square$

### 3.8 Sensitivity Analysis

We carried out sensitivity analysis, on the basic parameters, to identify their effect to the transmission of the disease. To go through sensitivity analysis, we used the normalized sensitivity index definition as defined in [20]. The Normalized forward sensitivity index of a variable,  $\mathfrak{R}_0$ , that depends differentiably on a parameter,  $p$ , is defined as:  $A_p^{\mathfrak{R}_0} = \frac{\partial \mathfrak{R}_0}{\partial p} \times \frac{p}{\mathfrak{R}_0}$  for  $p$  represents all the

basic parameters. Here we have  $\mathfrak{R}_0 = \frac{\beta \Pi (\sigma_1 \tau \delta + \sigma_2 (\epsilon + \rho + \mu))}{\mu (\epsilon + \rho + \mu) (\delta + \mu)}$ . For the sensitivity index of  $\mathfrak{R}_0$  to the parameters:

$$\begin{aligned}
 A_{\beta}^{\mathfrak{R}_0} &= \frac{\partial \mathfrak{R}_0}{\partial \beta} \times \frac{\beta}{\mathfrak{R}_0} = 1 > 0 \\
 A_{\sigma_1}^{\mathfrak{R}_0} &= \frac{\partial \mathfrak{R}_0}{\partial \sigma_1} \times \frac{\sigma_1}{\mathfrak{R}_0} = \frac{\sigma_1 \delta \tau \rho}{\sigma_1 \delta \tau + \sigma_2 (\epsilon + \rho + \mu)} > 0 \\
 A_{\sigma_2}^{\mathfrak{R}_0} &= \frac{\partial \mathfrak{R}_0}{\partial \sigma_2} \times \frac{\sigma_2}{\mathfrak{R}_0} = \frac{\sigma_2 (\epsilon + \rho + \mu)}{\sigma_1 \delta \tau + \sigma_2 (\epsilon + \rho + \mu)} > 0 \\
 A_{\tau}^{\mathfrak{R}_0} &= \frac{\partial \mathfrak{R}_0}{\partial \tau} \times \frac{\tau}{\mathfrak{R}_0} = \frac{\sigma_1 \tau \delta}{\sigma_1 \delta \tau + \sigma_2 (\epsilon + \rho + \mu)} > 0 \\
 A_{\delta}^{\mathfrak{R}_0} &= \frac{\partial \mathfrak{R}_0}{\partial \delta} \times \frac{\delta}{\mathfrak{R}_0} = \frac{\delta [\sigma_1 \delta \tau \mu - \sigma_2 (\epsilon + \rho + \mu)]}{(\epsilon + \rho + \mu) [\sigma_1 \delta \tau + \sigma_2 (\epsilon + \rho + \mu)]} > 0 \\
 A_{\rho}^{\mathfrak{R}_0} &= \frac{\partial \mathfrak{R}_0}{\partial \rho} \times \frac{\rho}{\mathfrak{R}_0} = -\frac{\sigma_1 \delta \tau \rho}{(\epsilon + \rho + \mu) [\sigma_1 \delta \tau + \sigma_2 (\epsilon + \rho + \mu)]} < 0 \\
 A_{\epsilon}^{\mathfrak{R}_0} &= \frac{\partial \mathfrak{R}_0}{\partial \epsilon} \times \frac{\epsilon}{\mathfrak{R}_0} = -\frac{\sigma_1 \tau \delta \epsilon}{(\epsilon + \rho + \mu) [\sigma_1 \delta \tau + \sigma_2 (\epsilon + \rho + \mu)]} < 0 \\
 A_{\mu}^{\mathfrak{R}_0} &= \frac{\partial \mathfrak{R}_0}{\partial \mu} \times \frac{\mu}{\mathfrak{R}_0} = -\frac{\beta \Pi [(\delta \tau + \rho)(\rho + \mu)(\delta + \mu) + (\delta \tau + \rho)(\delta - \rho)]}{\mu^2 (\rho + \mu)^2 (\delta + \mu)^2} < 0
 \end{aligned}$$

The sensitivity indices of the basic reproductive number with respect to main parameters are found in Table 2. Those parameters that have positive indices ( $\Pi$ ,  $\beta$ ,  $\sigma_1$ ,  $\sigma_1$ , and  $\tau$ ) show that they have great impact on expanding the disease in the community if their values are increasing. Also those parameters in which their sensitivity indices are negative ( $\delta$ ,  $\rho$ ,  $\epsilon$ , and  $\mu$ ) have an effect of minimizing the burden of the disease in the community as their values increase. Therefore, research advice for stakeholders to work on decreasing the positive indices and increasing negative indices parameters

Table 2: Sensitivity indices table.

| Parameter symbol | Sensitivity indices |
|------------------|---------------------|
| $\beta$          | +ve                 |
| $\sigma_1$       | +ve                 |
| $\sigma_2$       | +ve                 |
| $\tau$           | +ve                 |
| $\epsilon$       | -ve                 |
| $\delta$         | -ve                 |
| $\rho$           | -ve                 |
| $\mu$            | -ve                 |

## 4 Extension to an Optimal Control Model

Here we extend the basic model in (1) in to optimal control. As we indicated in section 1, Ethiopian goverment have started a lot of activities to combat COVID-19. Some of preventive activities are; forced isolation for 14 days for new arrivals, closing country border, quarantining and supporting infected individuals with medication, restricting number of sits by half in all transport system, convincing all media outlets to campaigning on COVID-19, announcing state of emergency and others. As we observe the started activities are not done in optimal level. Therefore, we want to show the concerned body the effectiveness of those activities if they are implemented in an optimal level. To perform optimal control, we categorize those activities in to three broad control strategies listed below.

- (i) All rounded prevention strategies including social distancing and personal hygiene (by this strategy we aimed to block susceptible from contacting the virus)
- (ii) Supporting infectives with medication (Optimal support of infected individual in quarantine center)
- (iii) Awareness creation through all Media outlets.

After incorporating the three controls in model (1) gives the following optimal control model in equation (15) below.

$$\begin{aligned}
 \frac{dS}{dt} &= \pi + \eta R - (1 - u_3)(1 - u_1)\beta(\sigma_1 I + \sigma_2 E)S - \mu S \\
 \frac{dE}{dt} &= (1 - u_3)(1 - u_1)\beta(\sigma_1 I + \sigma_2 E)S - (u_2 + u_3 + \delta + \mu) E \\
 \frac{dI}{dt} &= (1 - u_2)\tau \delta E - (u_2 + u_3 + \varepsilon + \rho + \mu) I \\
 \frac{dR}{dt} &= (1 - u_2)(1 - \tau)\delta E + (1 - u_2)\varepsilon I - (\mu + \eta) R
 \end{aligned} \tag{15}$$

The purpose of introducing controls in the model is to find the optimal level of the intervention strategy required to reduce the spreads the pandemic in the population. Here we want to find the optimal values  $u_1$ ,  $u_2$  and  $u_3$  that minimizes the objective functional subject to the differential equations (15). The objective functional is given as

$$J = \min_{u_1, u_2, u_3} \int_0^{t_f} \left[ a_1 E + a_2 I + \frac{1}{2}(w_1 u_1^2 + w_2 u_2^2 + w_3 u_3^2) \right] dt \tag{16}$$

where  $t_f$  is the final time,  $a_1$  and  $a_2$  are weight costs of the Exposed humans and infected humans respectively while  $w_1$ ,  $w_2$  and  $w_3$  are weight costs for each individual control measure. In this paper, a quadratic function which satisfies the optimality conditions is considered for measuring

the cost of the controls as applied by [21, 22, 23]. The goal is to find the optimal control  $(u_1^*, u_2^*, u_3^*)$  such that.

$$J(u_1^*, u_2^*, u_3^*) = \min\{J(u_1, u_2, u_3) | (u_1, u_2, u_3) \in U\}$$

where the control set

$$U = \{(u_1, u_2, u_3) | u_i(t) \text{ is lebesgue measurable on } [0, t_f], 0 \leq u_i(t) \leq 1, i = 1, 2, 3\}$$

#### 4.1 Hamiltonian and optimality equation

We used Pontryagin's Maximum Principle [24] to drive the necessary conditions that an optimal control must satisfy. This principle converts equation (15) and (16) into a problem of minimizing point-wise Hamiltonian ( $H$ ), with respect to  $u_1(t)$ ,  $u_2(t)$  and  $u_3(t)$  as:

$$\begin{aligned} H = H = & a_1 E + a_2 I + \frac{1}{2} w_1 u_1^2 + \frac{1}{2} w_2 u_2^2 + \frac{1}{2} w_3 u_3^2 \\ & + \lambda_1 [\Pi + \eta R - (1 - u_3) (1 - u_1) \beta (\sigma_2 E + \sigma_1 I) S - \mu S] \\ & + \lambda_2 [(1 - u_3) (1 - u_1) \beta (\sigma_2 E + \sigma_1 I) S - (\delta + u_2 + u_3 + \mu) e] \\ & + \lambda_3 [(1 - u_2) \tau \delta E - (\varepsilon + u_2 + u_3 + \rho + \mu) I] \\ & + \lambda_4 [(1 - u_2) (1 - \tau) \delta E + (1 - u_2) \varepsilon I - (\mu + \eta) R] \end{aligned}$$

Where  $\lambda_i, i = 1, 2, 3, 4$  are the adjoint variable associated with  $S, E, I$ , and  $R$  to be determined suitably by applying Pontryagin's maximal principle [24] and also using [25], the existence of an optimal control is guaranteed.

**Theorem 4.1.** *For an optimal control set  $u_1, u_2, u_3$  that minimizes  $J$  over  $U$ , there are adjoint variables,  $\lambda_1, \dots, \lambda_4$  such that:*

$$\left\{ \begin{aligned} \frac{d\lambda_1}{dt} &= \lambda_1 [(1 - u_3) (1 - u_1) \beta (\sigma_2 E + \sigma_1 I) + \mu] - \lambda_2 [(1 - u_3) (1 - u_1) \beta (\sigma_2 E + \sigma_1 I)] \\ \frac{d\lambda_2}{dt} &= -a_1 + \lambda_1 [(1 - u_3) (1 - u_1) \beta \sigma_2 S] - \lambda_2 [(1 - u_3) (1 - u_1) \beta \sigma_2 S - (\delta + u_2 + u_3 + \mu)] \\ &\quad - \lambda_3 [(1 - u_2) \tau \delta] - \lambda_4 [(1 - u_2) (1 - \tau) \delta] \\ \frac{d\lambda_3}{dt} &= -a_2 + \lambda_1 [(1 - u_3) (1 - u_1) \beta \sigma_1 S] - \lambda_2 [(1 - u_3) (1 - u_1) \beta \sigma_1 S] \\ &\quad + \lambda_3 [\varepsilon + u_2 + u_3 + \rho + \mu] - \lambda_4 [(1 - u_2) \varepsilon] \\ \frac{d\lambda_4}{dt} &= -\lambda_1 [\eta] + \lambda_4 [\mu + \eta] \end{aligned} \right.$$

With transversality conditions,  $\lambda_i(t_f) = 0, i = 1, \dots, 4$ . Furthermore, we obtain the control set  $(u_1^*, u_2^*, u_3^*)$  characterized by

$$u_1^* = \max\{0, \min(1, \psi_1)\}$$

$$u_2^* = \max\{0, \min(1, \psi_2)\}$$

$$u_3^* = \max\{0, \min(1, \psi_3)\}$$

Where

$$\begin{aligned}\psi_1 &= \frac{\beta (1 - u_3) S (\sigma_2 E + \sigma_1 I) (\lambda_2 - \lambda_1)}{w_1} \\ \psi_2 &= \frac{\lambda_2 E + \lambda_4 ((1 - \tau) \delta E + \varepsilon I) + \lambda_3 (\delta \tau E + I)}{w_2} \\ \psi_3 &= \frac{\beta (1 - u_1) S (\sigma_2 E + \sigma_1 I) (\lambda_2 - \lambda_1)}{w_3}\end{aligned}$$

*Proof.* The adjoint equation and transversality conditions are standard results from Pontryagin's maximum principle [24]. We differentiate Hamiltonian with respect to states  $S, E, I$  and  $R$  respectively, and then the adjoint system is written as

$$\left\{ \begin{aligned} \frac{d\lambda_1}{dt} &= -\frac{\partial H}{\partial S} = \lambda_1[(1 - u_3)(1 - u_1)\beta(\sigma_2 E + \sigma_1 I) + \mu] - \lambda_2[(1 - u_3)(1 - u_1)\beta(\sigma_2 E + \sigma_1 I)] \\ \frac{d\lambda_2}{dt} &= -\frac{\partial H}{\partial E} = -a_1 + \lambda_1[(1 - u_3)(1 - u_1)\beta\sigma_2 S] - \lambda_2[(1 - u_3)(1 - u_1)\beta\sigma_2 S - (\delta + u_2 + u_3 + \mu)] \\ &\quad - \lambda_3[(1 - u_2)\tau\delta] - \lambda_4[(1 - u_2)(1 - \tau)\delta] \\ \frac{d\lambda_3}{dt} &= -\frac{\partial H}{\partial I} = -a_2 + \lambda_1[(1 - u_3)(1 - u_1)\beta\sigma_1 S] - \lambda_2[(1 - u_3)(1 - u_1)\beta\sigma_1 S] \\ &\quad + \lambda_3[\varepsilon + u_2 + u_3 + \rho + \mu] - \lambda_4[(1 - u_2)\varepsilon] \\ \frac{d\lambda_4}{dt} &= -\frac{\partial H}{\partial R} = -\lambda_1[\eta] + \lambda_4[\mu + \eta] \end{aligned} \right.$$

With transversality conditions,  $\lambda_i(t_f) = 0, i = 1, \dots, 4$ . Similarly by following the approach of Pontryagin et al. [24], the characterization of optimal controls  $u_1^*, u_2^*, u_3^*$ , that is, the optimality equations are obtained based on the conditions:  $\frac{\partial H}{\partial u_i} = 0$ , for  $i = 1, \dots, 3$ , which gives,

$$\begin{aligned}\frac{\partial H}{\partial u_1} &= w_1 u_1 + \lambda_1[(1 - u_3)\beta(\sigma_2 E + \sigma_1 I)S] + \lambda_2[-(1 - u_3)\beta(\sigma_2 E + \sigma_1 I)S] \\ \frac{\partial H}{\partial u_2} &= w_2 u_2 + \lambda_2[-E] + \lambda_3[-\tau\delta E - I] + \lambda_4[-(1 - \tau)\delta E - \varepsilon I] \\ \frac{\partial H}{\partial u_3} &= w_3 u_3 + \lambda_1[(1 - u_1)\beta(\sigma_2 E + \sigma_1 I)S] + \lambda_2[-(1 - u_1)\beta(\sigma_2 E + \sigma_1 I)S]\end{aligned}$$

Setting  $\frac{\partial H}{\partial u_i} = 0$  at  $u_i^*$ , the results are

$$\begin{aligned}u_1^* &= \frac{\beta (1 - u_3) S (\sigma_2 E + \sigma_1 I) (\lambda_2 - \lambda_1)}{w_1} \\ u_2^* &= \frac{\lambda_2 E + \lambda_4 ((1 - \tau) \delta E + \varepsilon I) + \lambda_3 (\delta \tau E + I)}{w_2} \\ u_3^* &= \frac{\beta (1 - u_1) S (\sigma_2 E + \sigma_1 I) (\lambda_2 - \lambda_1)}{w_3}\end{aligned}$$

When we write by using standard control arguments involving the bounds on the controls, we conclude

$$u_1^* = \begin{cases} \psi_1, & \text{if } 0 < \psi_1 < 1; \\ 0, & \text{if } \psi_1 \leq 0; \\ 1, & \text{if } \psi_1 \geq 1 \end{cases}, u_2^* = \begin{cases} \psi_2, & \text{if } 0 < \psi_2 < 1; \\ 0, & \text{if } \psi_2 \leq 0; \\ 1, & \text{if } \psi_2 \geq 1 \end{cases}, u_3^* = \begin{cases} \psi_3, & \text{if } 0 < \psi_3 < 1; \\ 0, & \text{if } \psi_3 \leq 0; \\ 1, & \text{if } \psi_3 \geq 1 \end{cases}$$

In compact notation

$$u_1^* = \max\{0, \min(1, \psi_1)\}, \quad u_2^* = \max\{0, \min(1, \psi_2)\}, \quad u_3^* = \max\{0, \min(1, \psi_3)\}$$

The optimality system is formed from the optimal control system (the state system) and the adjoint variable system by incorporating the characterized control set and initial and transversal condition

$$\left\{ \begin{array}{l}
 \frac{dS}{dt} = \pi + \eta R - (1 - u_3) (1 - u_1) \beta (\sigma_1 I + \sigma_2 E) S - \mu S \\
 \frac{dE}{dt} = (1 - u_3) (1 - u_1) \beta (\sigma_1 I + \sigma_2 E) S - (u_2 + u_3 + \delta + \mu) E \\
 \frac{dI}{dt} = (1 - u_2) \tau \delta E - (u_2 + u_3 + \varepsilon + \rho + \mu) I \\
 \frac{dR}{dt} = (1 - u_2) (1 - \tau) \delta E + (1 - u_2) \varepsilon I - (\mu + \eta) R \\
 \frac{d\lambda_1}{dt} = \lambda_1 [(1 - u_3) (1 - u_1) \beta (\sigma_2 E + \sigma_1 I) + \mu] - \lambda_2 [(1 - u_3) (1 - u_1) \beta (\sigma_2 E + \sigma_1 I)] \\
 \frac{d\lambda_2}{dt} = -a_1 + \lambda_1 [(1 - u_3) (1 - u_1) \beta \sigma_2 S] - \lambda_2 [(1 - u_3) (1 - u_1) \beta \sigma_2 S - (\delta + u_2 + u_3 + \mu)] \\
 \quad - \lambda_3 [(1 - u_2) \tau \delta] - \lambda_4 [(1 - u_2) (1 - \tau) \delta] \\
 \frac{d\lambda_3}{dt} = -a_2 + \lambda_1 [(1 - u_3) (1 - u_1) \beta \sigma_1 S] - \lambda_2 [(1 - u_3) (1 - u_1) \beta \sigma_1 S] \\
 \quad + \lambda_3 [\varepsilon + u_2 + u_3 + \rho + \mu] - \lambda_4 [(1 - u_2) \varepsilon] \\
 \frac{d\lambda_4}{dt} = -\lambda_1 [\eta] + \lambda_4 [\mu + \eta] \\
 u_1^* = \frac{\beta (1 - u_3) S (\sigma_2 E + \sigma_1 I) (\lambda_2 - \lambda_1)}{w_1} \\
 u_2^* = \frac{\lambda_2 E + \lambda_4 ((1 - \tau) \delta E + \varepsilon I) + \lambda_3 (\delta \tau E + I)}{w_2} \\
 u_3^* = \frac{\beta (1 - u_1) S (\sigma_2 E + \sigma_1 I) (\lambda_2 - \lambda_1)}{w_3}
 \end{array} \right. \tag{17}$$

$$\lambda_i(t_f) = 0, i = 1, \dots, 4 \quad S(0) = S_0, E(0) = E_0, I(0) = I_0, R(0) = R_0$$

□

## 4.2 Uniqueness of the Optimality System

Due to the a priori boundedness of the state, adjoint functions and the resulting Lipschitz structure of the ODEs, we can obtain the uniqueness of solutions of the optimality system for the small time interval. Hence the following theorem

**Theorem 4.2.** *For  $t \in [0, t_f]$ , the bounded solutions to the optimality system are unique. For the proof of the theorem [26].*



## 5 Numerical Simulations

In this section, we examine the COVID 19 model and studied the effects of combined strategies on controlling the transmission of the disease. The optimal control set was obtained by solving the optimality system, consisting of the state and adjoint systems. An iterative scheme was used for solving the optimality system. We start to solve the state equations with an initial guess for the controls over the simulated time using the forward fourth order Runge–Kutta scheme. Because of the transversality conditions, the adjoint equations were solved by a backward fourth order Runge–Kutta scheme using the current iterated solutions of the state equation. Then the controls are updated by using a convex combination of the previous controls and the value from the characterizations. This process is repeated and iterations are stopped if the values of the unknowns at the previous iteration are very close to the ones at the present iteration. For numerical simulation purpose, we have used empirical data of COVID-19 cases in Ethiopia for estimation of parameters in Table 3.

Table 3: Parameter values for COVID-19 model.

| Parameter symbol | Value  | Source    |
|------------------|--------|-----------|
| $\pi$            | 13.5   | Estimated |
| $\beta$          | 0.0143 | Estimated |
| $\sigma_1$       | 0.0001 | Assumed   |
| $\sigma_2$       | 0.02   | Assumed   |
| $\delta$         | 0.07   | Estimated |
| $\mu$            | 0.016  | Estimated |
| $\rho$           | 0.0004 | Estimated |
| $\tau$           | 0.7    | Assumed   |
| $\epsilon$       | 0.15   | Estimated |
| $\eta$           | 0.15   | Estimated |

We investigated numerically the effect of the following optimal control strategies on the spread of COVID 19 in a population. Considering strategies that implement one intervention only is not guaranteed to reduce and/or eradicate the disease totally from the community. So that those strategies which incorporate more than one intervention are ordered below and compared pairwise:

- **Strategy A:** Preventive measures ( $u_1$ ) & supporting infectives with medication ( $u_2$ )
- **Strategy B:** Preventive measures ( $u_1$ ) & media campaign ( $u_3$ )

- **Strategy C:** Supporting infectives with medication ( $u_2$ ) & media campaign ( $u_3$ )
- **Strategy D:** Using all control techniques ( $u_1, u_2$  &  $u_3$ )

In addition to those parameter values in Table 3, we used  $a_1 = 1$ ,  $a_2 = 5$ ,  $w_1 = 40$ ,  $w_2 = 150$  and  $w_3 = 75$  for simulation of COVID 19 pandemic disease model.

### 5.1 Strategy A: Control with preventive measures & supporting infectives with medication

Here we have investigated the impact of optimal prevention methods and supporting infected individuals in quarantine center with medication treatment. From the simulation results of Figure 2, we see that the combination of the two method is effective in controlling COVID-19 in the specified period. Moreover, we can see that after implementing this strategy the number of exposed and infected human population goes to zero after 15 months.

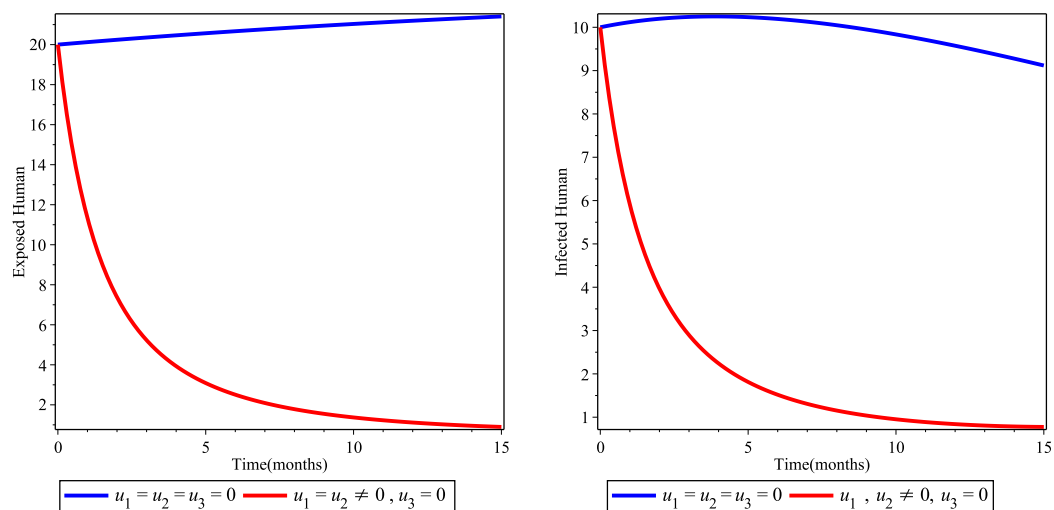

Figure 2: Simulations of the COVID 19 model with preventive measure & supporting infectives with medication .

### 5.2 Strategy B: Control with preventive measures & media campaign

Here also we experimented by combining preventive measure and awareness creation through media campaign. From the numerical result depicted in Figure 3 below (the left hand side) show as it is possible to combat the exposed human population of COVID-19 to zero after 8 months and it will also start to relapse again after 10 months. The right hand side of Figure 3 also indicate that as it is possible to minimize infected-COVID-19 humans but unable to eliminate by this strategy in the stated time. Also this method is not effective once the infectious individuals are entered in the country.

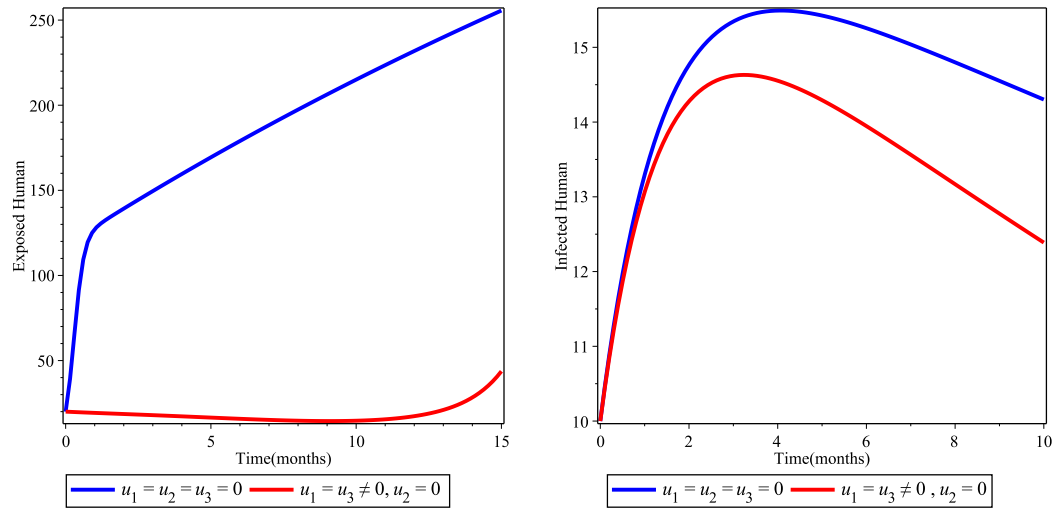

Figure 3: Simulations of the COVID 19 model with Social distancing with personal hygiene & Media campaign .

### 5.3 Strategy C: Control with supporting infectives by medication & media campaign

Here we experimented the model considering optimal support of infected individuals in quarantine center and creating awareness through media. Any activities from preventive technique of the disease is not considered here. From the numerical result depicted in Figure 4 shows that as COVID-19 will relapse for second time after it goes to zero in the specified time.

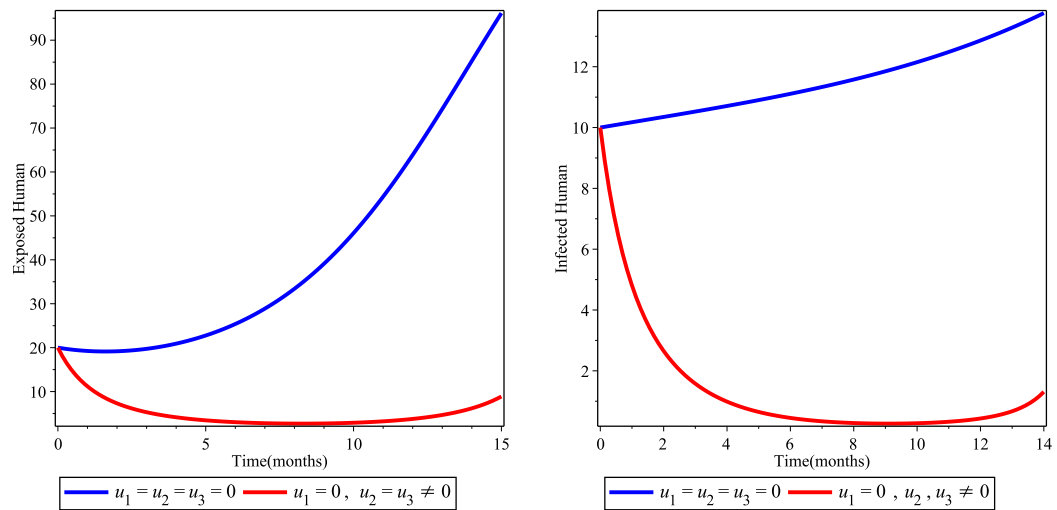

Figure 4: Simulations of the COVID 19 model with Supporting infectives with medication & Media campaign .

### 5.4 Strategy D: Using All Control Strategies

Here we have applied all strategies to optimize the objective function. The results from Figure 5 shows that bringing down the exposed and infected population in short period of time and it is best

compared to all the above three control technique. Therefore, government decision makers and all stakeholders consider in applying all strategies to combat COVID-19 in the specified time.

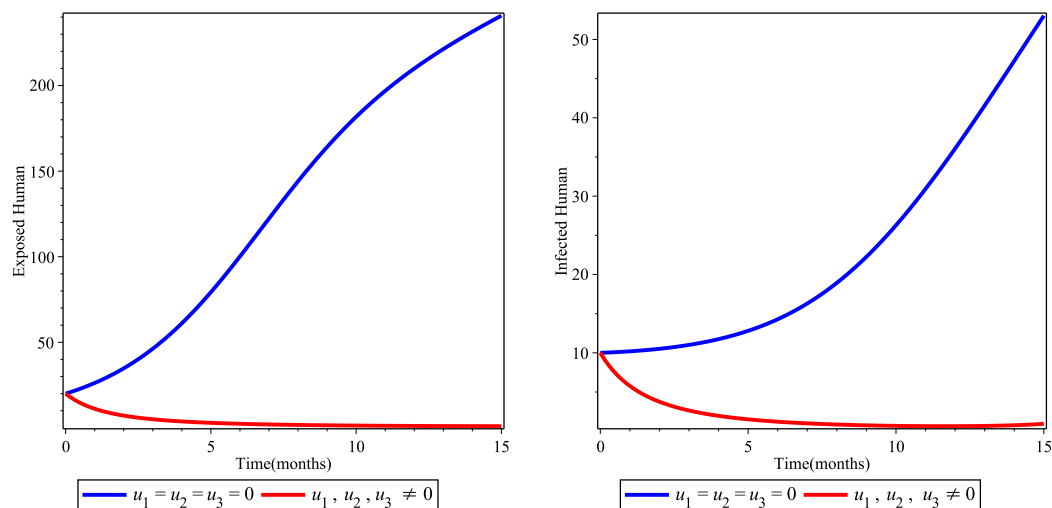

Figure 5: Simulations of the model with all control strategies.

## 6 Discussions and Conclusions

In this paper an SEIR deterministic model for the transmission dynamics of the pandemic COVID-19 in the case of Ethiopia was formulated. Model analysis demonstrates that its solutions are positive and bounded, and there is a region where the model is well-posed mathematically and epidemiologically meaningful. The basic reproduction number  $\mathcal{R}_0$  was computed and the stability of equilibria points was investigated. Through Lyapunov's theory, the disease free equilibrium point globally asymptotically stable whenever the  $\mathcal{R}_0 < 1$  was proven. Using center manifold theory, bifurcation analysis of the model was proven and the model exhibits forward bifurcation at  $\mathcal{R}_0 = 1$ .

Second, by adding three time-dependent controls, we extend the basic model in to an optimal control. By using Pontryagin's Maximum Principle necessary conditions for the optimal control of the transmission of COVID-19 were derived. From the numerical simulation it was found that the integrated control strategy, strategy D: using all technique, is very efficient in short period of time. Therefore, applying all rounded technique by the EFDRE, decision makers and stakeholders have a significant contribution in combating this pandemic in very short period of time. The result also shows, if the stakeholders could not do all of the intervention strategies together, the pandemic may come again and will transmit over the country.

This paper is still an ongoing research as many more investigations regarding this disease can be

carried out. Yet, it serves as the starting phase to research more in depth on questions that COVID-19 is spreading with incredible speed and have severe consequences. Moreover, to identify those exposed individuals who doesn't develop clinical sign, mass screening in any cost is recommended to combat COVID-19.

## **Data Availability**

All data relevant to this publication will be provided when needed.

## **Conflicts of Interest**

Authors have declared that no competing interests exist.

## **Authors' contribution**

All authors contributed equally.

## **References**

- [1] World Health Organization (WHO). Coronavirus disease 2019 (covid-19): situation report, 68. 2020.
- [2] World Health Organisation (WHO). Coronavirus disease (covid-19) outbreak 2020 [internet]. *Geneva: WHO; 2020 [cited 2020 27 March]*, Available from: <https://www.who.int/emergencies/diseases/novelcoronavirus-2019>.
- [3] European Centre for Disease Prevention and Control (ECDC). Infection prevention and control in the household management of people with suspected or confirmed coronavirus disease (covid-19). *Stockholm: ECDC; 2020*, Available from: <https://www.ecdc.europa.eu/en/publications-data/infection-prevention-control-household-management-covid-19>.
- [4] Hussin A Rothan and Siddappa N Byrareddy. The epidemiology and pathogenesis of coronavirus disease (covid-19) outbreak. *Journal of autoimmunity*, page 102433, 2020.

- [5] Weier Wang, Jianming Tang, and Fangqiang Wei. Updated understanding of the outbreak of 2019 novel coronavirus (2019-ncov) in wuhan, china. *Journal of medical virology*, 92(4): 441–447, 2020.
- [6] Shi Zhao, Qianyin Lin, Jinjun Ran, Salihu S Musa, Guangpu Yang, Weiming Wang, Yijun Lou, Daozhou Gao, Lin Yang, Daihai He, et al. Preliminary estimation of the basic reproduction number of novel coronavirus (2019-ncov) in china, from 2019 to 2020: A data-driven analysis in the early phase of the outbreak. *International journal of infectious diseases*, 92: 214–217, 2020.
- [7] World Health Organization(WHO). Coronavirus disease 2019 (covid-19): situation report, 92. 2020.
- [8] World Health Organization (WHO). Coronavirus disease 2019 (covid-19): situation report, 72. 2020.
- [9] Centers for Disease Control and Prevention (CDC). Infection prevention and control in the household management of people with suspected or confirmed coronavirus disease (covid-19). *Atlanta: CDC;2020[cited 2020 22 Aprile]*, Available from: <https://www.cdc.gov/coronavirus/2019-ncov/downloads/2019-ncov-factsheet.pdf>.
- [10] Annelies Wilder-Smith and DO Freedman. Isolation, quarantine, social distancing and community containment: pivotal role for old-style public health measures in the novel coronavirus (2019-ncov) outbreak. *Journal of travel medicine*, 27(2):taaa020, 2020.
- [11] Milan Batista. Estimation of the final size of the covid-19 epidemic. *Preprint.] medRxiv*, 2020.
- [12] Liangrong Peng, Wuyue Yang, Dongyan Zhang, Changjing Zhuge, and Liu Hong. Epidemic analysis of covid-19 in china by dynamical modeling. *arXiv preprint arXiv:2002.06563*, 2020.
- [13] Qianying Lin, Shi Zhao, Daozhou Gao, Yijun Lou, Shu Yang, Salihu S Musa, Maggie H Wang, Yongli Cai, Weiming Wang, Lin Yang, et al. A conceptual model for the coronavirus disease 2019 (covid-19) outbreak in wuhan, china with individual reaction and governmental action. *International journal of infectious diseases*, 93:211–216, 2020.
- [14] Kiesha Prem, Yang Liu, Timothy W Russell, Adam J Kucharski, Rosalind M Eggo, Nicholas Davies, Stefan Flasche, Samuel Clifford, Carl AB Pearson, James D Munday, et al. The effect

- of control strategies to reduce social mixing on outcomes of the covid-19 epidemic in wuhan, china: a modelling study. *The Lancet Public Health*, 2020.
- [15] Alexander Victor. Mathematical predictions for covid-19 as a global pandemic. *Available at SSRN 3555879*, 2020.
- [16] B Ivorra, MR Ferrándezb, M Vela-Pérez, and AM Ramos. Mathematical modeling of the spread of the coronavirus disease 2019 (covid-19) taking into account the undetected infections. the case of china. *Research Gate*, 2020.
- [17] Giulia Giordano, Franco Blanchini, Raffaele Bruno, Patrizio Colaneri, Alessandro Di Filippo, Angela Di Matteo, Marta Colaneri, et al. A sidarthe model of covid-19 epidemic in italy. *arXiv preprint arXiv:2003.09861*, 2020.
- [18] P. Van den Driessche and J. Watmough. Reproduction numbers and sub-threshold endemic equilibria for compartmental models of disease transmission. *Mathematical biosciences*, 180(1):29–48, 2002.
- [19] C. Castillo-Chavez and B. Song. Dynamical models of tuberculosis and their applications. *Mathematical biosciences and engineering*, 1(2):361–404, 2004.
- [20] S. M. Blower and H. Dowlatabadi. Sensitivity and uncertainty analysis of complex models of disease transmission: an hiv model, as an example. *International Statistical Review/Revue Internationale de Statistique*, pages 229–243, 1994.
- [21] Getachew Teshome Tilahun, Oluwole Daniel Makinde, and David Malonza. Modelling and optimal control of typhoid fever disease with cost-effective strategies. *Computational and mathematical methods in medicine*, 2017, 2017.
- [22] Getachew Teshome Tilahun, Oluwole Daniel Makinde, and David Malonza. Co-dynamics of pneumonia and typhoid fever diseases with cost effective optimal control analysis. *Applied Mathematics and Computation*, 316:438–459, 2018.
- [23] Getachew Teshome Tilahun, Oluwole Daniel Makinde, and David Malonza. Modelling and optimal control of pneumonia disease with cost-effective strategies. *Journal of Biological Dynamics*, pages 1–27, 2017.
- [24] Lev Semenovich Pontryagin. *Mathematical theory of optimal processes*. CRC Press, 1987.

[25] Wendell H Fleming and Raymond W Rishel. Deterministic and stochastic optimal control. *Applications of Mathematics. Volume, 1*, 1976.

[26] K Renee Fister, Suzanne Lenhart, and Joseph Scott McNally. Optimizing chemotherapy in an hiv model. *Electronic Journal of Differential Equations*, 1998(32):1–12, 1998.



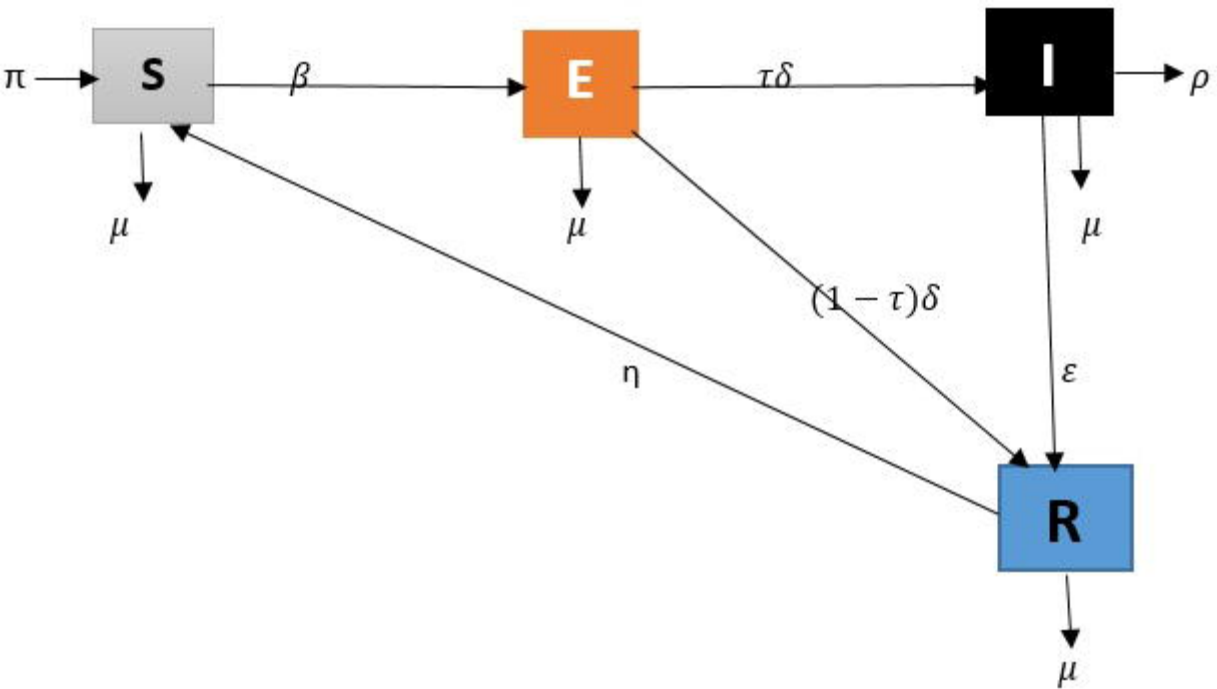

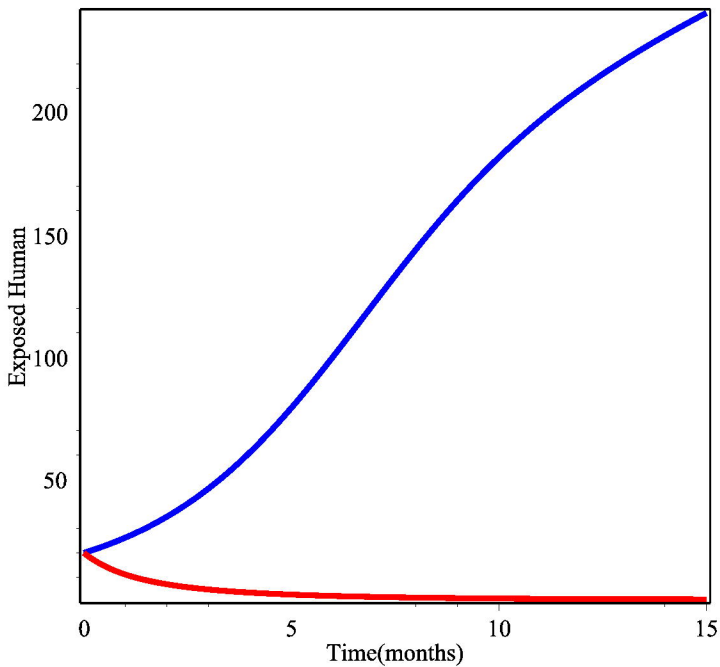

**—  $u_1 = u_2 = u_3 = 0$  —  $u_1, u_2, u_3 \neq 0$**

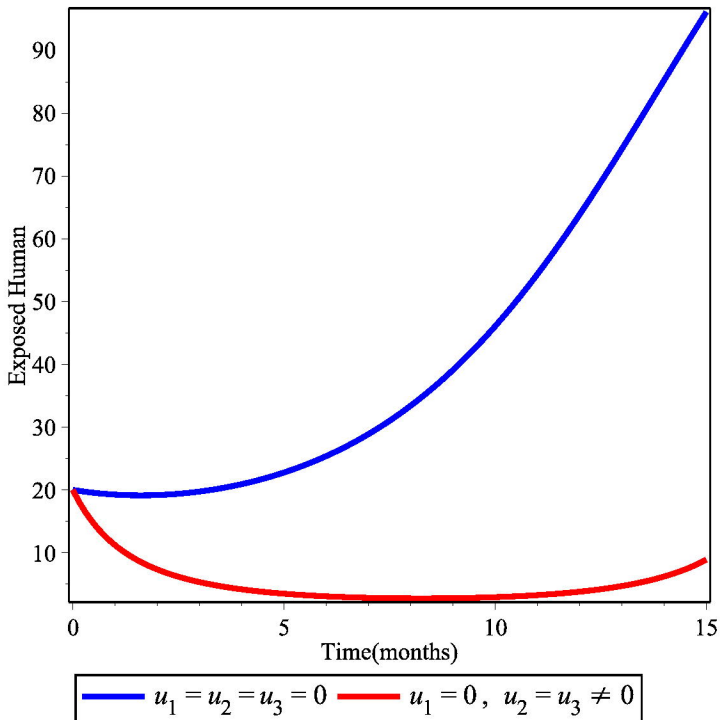

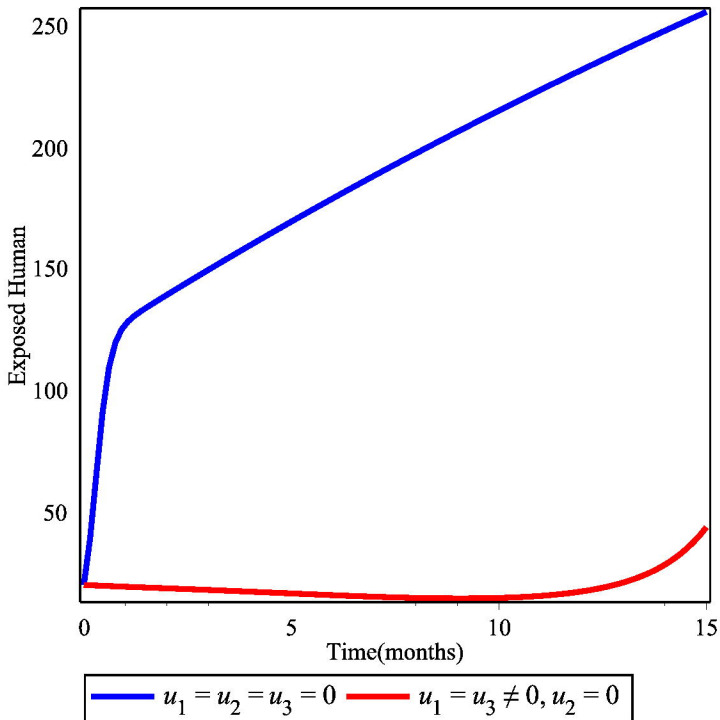

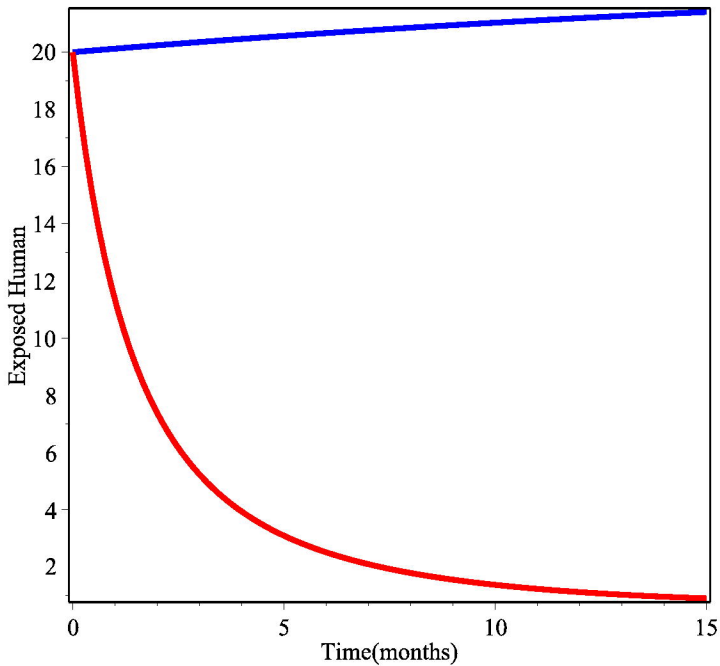

**—**  $u_1 = u_2 = u_3 = 0$     **—**  $u_1 = u_2 \neq 0, u_3 = 0$

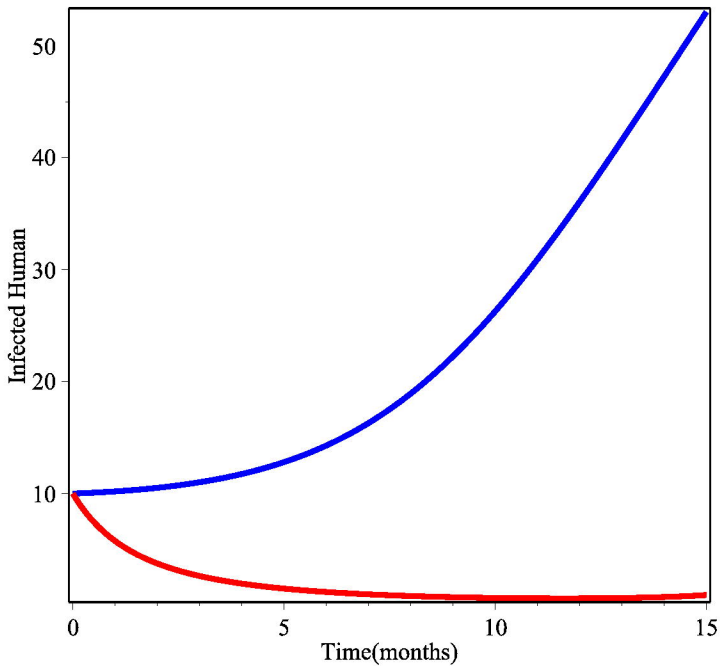

**—  $u_1 = u_2 = u_3 = 0$  —  $u_1, u_2, u_3 \neq 0$**

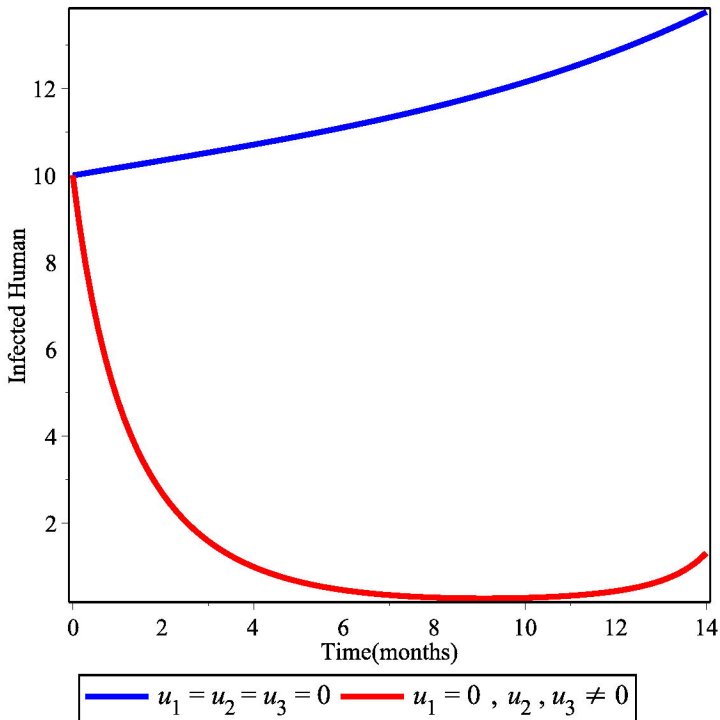

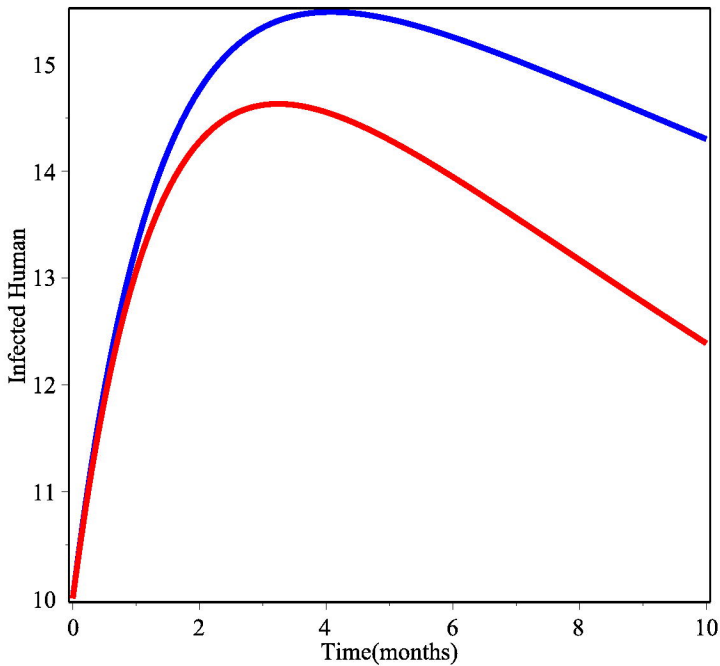

—  $u_1 = u_2 = u_3 = 0$  —  $u_1 = u_3 \neq 0, u_2 = 0$



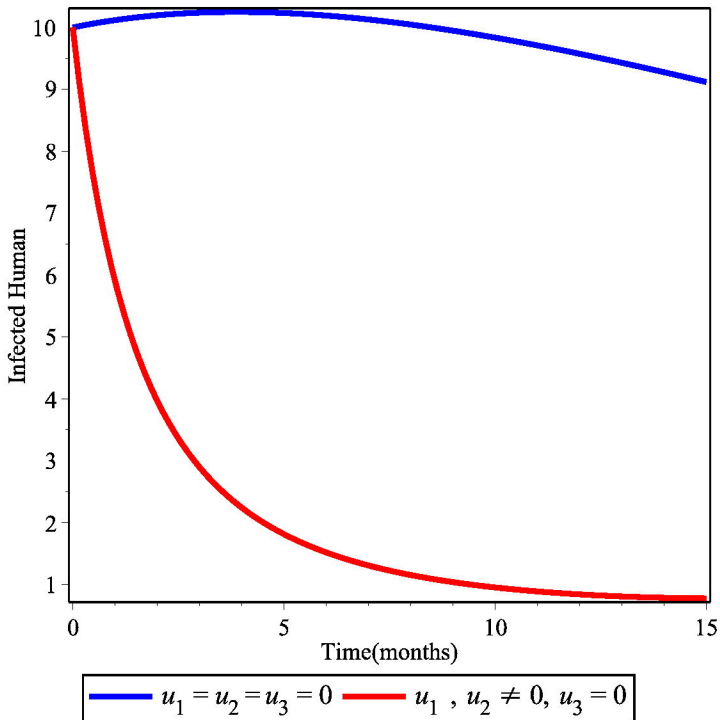

Source: https://medrxiv.org/content/10.1101/2020.07.23.20160473.full.pdf
